# Supplementary material for: Predicting cardiac adverse events in patients receiving immune checkpoint inhibitors: a machine learning approach
Source: PubMed Central journal article supplement — J Immunother Cancer. 2021 Oct 4;9(10):e002545. doi: 10.1136/jitc-2021-002545 (PMC8491414; doi:10.1136/jitc-2021-002545), 2021-10-04

## Supplementary Material

**Supplementary Table 1.** ICD definition of autoimmune conditions

| Condition                                                      | ICD-9-CM Diagnosis Code                                                                                                                                                                                                                                                                                                                                                                                                                                                                                                                                                                                                                                            | ICD-10-CM Diagnosis Code                                                                                                                                                                                                                                                                                                                                                                                                                                                                                                                   |
|----------------------------------------------------------------|--------------------------------------------------------------------------------------------------------------------------------------------------------------------------------------------------------------------------------------------------------------------------------------------------------------------------------------------------------------------------------------------------------------------------------------------------------------------------------------------------------------------------------------------------------------------------------------------------------------------------------------------------------------------|--------------------------------------------------------------------------------------------------------------------------------------------------------------------------------------------------------------------------------------------------------------------------------------------------------------------------------------------------------------------------------------------------------------------------------------------------------------------------------------------------------------------------------------------|
| Addison's disease                                              | <ul style="list-style-type: none"> <li>• 255.41 Glucocorticoid deficiency               <ul style="list-style-type: none"> <li>○ Addisonian crisis</li> <li>○ Addison's disease NOS</li> <li>○ Adrenal atrophy (autoimmune)</li> <li>○ Adrenal calcification</li> <li>○ Adrenal crisis</li> <li>○ Adrenal hemorrhage</li> <li>○ Adrenal infarction</li> <li>○ Adrenal insufficiency NOS</li> <li>○ Combined glucocorticoid and mineralocorticoid deficiency</li> <li>○ Corticoadrenal insufficiency NOS</li> </ul> </li> <li>• 255.42 Mineralocorticoid deficiency               <ul style="list-style-type: none"> <li>○ Hypoaldosteronism</li> </ul> </li> </ul> | <ul style="list-style-type: none"> <li>• E27.1 Primary adrenocortical insufficiency               <ul style="list-style-type: none"> <li>○ Addison's disease</li> <li>○ Autoimmune adrenalitis</li> </ul> </li> <li>• E27.2 Addisonian crisis               <ul style="list-style-type: none"> <li>○ Adrenal crisis</li> <li>○ Adrenocortical crisis</li> </ul> </li> <li>• E27.40 Unspecified               <ul style="list-style-type: none"> <li>○ Adrenocortical insufficiency NOS</li> <li>○ Hypoaldosteronism</li> </ul> </li> </ul> |
| Alopecia areata                                                | <ul style="list-style-type: none"> <li>• 704.01 Alopecia areata</li> </ul>                                                                                                                                                                                                                                                                                                                                                                                                                                                                                                                                                                                         | <ul style="list-style-type: none"> <li>• L63 Alopecia areata</li> </ul>                                                                                                                                                                                                                                                                                                                                                                                                                                                                    |
| Ankylosing spondylitis                                         | <ul style="list-style-type: none"> <li>• 720.0 Ankylosing spondylitis</li> </ul>                                                                                                                                                                                                                                                                                                                                                                                                                                                                                                                                                                                   | <ul style="list-style-type: none"> <li>• M45 Ankylosing spondylitis</li> </ul>                                                                                                                                                                                                                                                                                                                                                                                                                                                             |
| Crohn's disease                                                | <ul style="list-style-type: none"> <li>• 555 Regional enteritis               <ul style="list-style-type: none"> <li>○ Crohn's disease</li> <li>○ Granulomatous enteritis</li> </ul> </li> </ul>                                                                                                                                                                                                                                                                                                                                                                                                                                                                   | <ul style="list-style-type: none"> <li>• K50 Crohn's disease</li> </ul>                                                                                                                                                                                                                                                                                                                                                                                                                                                                    |
| Celiac disease                                                 | <ul style="list-style-type: none"> <li>• 579.0 Celiac disease</li> </ul>                                                                                                                                                                                                                                                                                                                                                                                                                                                                                                                                                                                           | <ul style="list-style-type: none"> <li>• K90.0 Celiac disease</li> </ul>                                                                                                                                                                                                                                                                                                                                                                                                                                                                   |
| Other and unspecified noninfective gastroenteritis and colitis | <ul style="list-style-type: none"> <li>• 558.9 Other and unspecified noninfectious gastroenteritis and colitis</li> </ul>                                                                                                                                                                                                                                                                                                                                                                                                                                                                                                                                          | <ul style="list-style-type: none"> <li>• K52.3 Indeterminate colitis</li> <li>• K52.8 Other specified noninfective gastroenteritis and colitis</li> <li>• K52.9 noninfective gastroenteritis and colitis, unspecified</li> </ul>                                                                                                                                                                                                                                                                                                           |
| Multiple sclerosis                                             | <ul style="list-style-type: none"> <li>• 340 Multiple sclerosis</li> <li>• 323.61 Infectious acute disseminated encephalomyelitis</li> <li>• 323.81 Other causes of encephalitis and encephalomyelitis</li> </ul>                                                                                                                                                                                                                                                                                                                                                                                                                                                  | <ul style="list-style-type: none"> <li>• G04.0 Acute disseminated encephalitis and encephalomyelitis</li> <li>• G04.8 Other encephalitis, myelitis and encephalomyelitis</li> </ul>                                                                                                                                                                                                                                                                                                                                                        |

|                   |                                                                                                                                                                                                                                                                                                                                                                                                                                                                                                                                                                       |                                                                                                                                                                                                                                                                                                                                                                                                                                                                                                 |
|-------------------|-----------------------------------------------------------------------------------------------------------------------------------------------------------------------------------------------------------------------------------------------------------------------------------------------------------------------------------------------------------------------------------------------------------------------------------------------------------------------------------------------------------------------------------------------------------------------|-------------------------------------------------------------------------------------------------------------------------------------------------------------------------------------------------------------------------------------------------------------------------------------------------------------------------------------------------------------------------------------------------------------------------------------------------------------------------------------------------|
|                   | <ul style="list-style-type: none"> <li>• 323.82 Other causes of myelitis</li> <li>• 323.9 Unspecified causes of encephalitis, myelitis and encephalomyelitis</li> </ul>                                                                                                                                                                                                                                                                                                                                                                                               | <ul style="list-style-type: none"> <li>• G04.9 Encephalitis, myelitis and encephalomyelitis, unspecified</li> <li>• G35 Multiple sclerosis</li> </ul>                                                                                                                                                                                                                                                                                                                                           |
| Myasthenia gravis | <ul style="list-style-type: none"> <li>• 358.0 Myasthenia gravis</li> <li>• 358.1 Myasthenic syndromes in diseases classified elsewhere</li> </ul>                                                                                                                                                                                                                                                                                                                                                                                                                    | <ul style="list-style-type: none"> <li>• G70.0 Myasthenia gravis</li> <li>• G73.3 Myasthenic syndromes in other diseases classified elsewhere</li> </ul>                                                                                                                                                                                                                                                                                                                                        |
| Myocarditis       | <ul style="list-style-type: none"> <li>• 422.0 Acute myocarditis in diseases classified elsewhere</li> <li>• 422.91 Idiopathic myocarditis</li> <li>• 422.93 Toxic myocarditis</li> <li>• 422.99 Other acute myocarditis</li> <li>• 422.90 Acute myocarditis, unspecified</li> <li>• 429.0 Myocarditis, unspecified</li> <li>• 429.81 Other disorders of papillary muscle</li> <li>• 429.82 Hyperkinetic heart disease</li> <li>• 429.83 Takotsubo syndrome</li> <li>• 429.89 Other ill-defined heart diseases</li> <li>• 429.9 Heart disease, unspecified</li> </ul> | <ul style="list-style-type: none"> <li>• I40.0 Infective myocarditis</li> <li>• I40.1 Isolated myocarditis</li> <li>• I40.8 Other acute myocarditis</li> <li>• I40.9 Acute myocarditis, unspecified</li> <li>• I41 Myocarditis in diseases classified elsewhere</li> <li>• I51.4 Myocarditis, unspecified</li> <li>• I51.8 Other ill-defined heart diseases</li> <li>• I51.9 Heart diseases, unspecified</li> </ul>                                                                             |
| Myositis          | <ul style="list-style-type: none"> <li>• 376.12 Orbital myositis</li> <li>• 710.3 Dermatomyositis</li> <li>• 710.4 Polymyositis</li> <li>• 728.81 Interstitial myositis</li> <li>• 729.1 Myalgia and myositis, unspecified</li> </ul>                                                                                                                                                                                                                                                                                                                                 | <ul style="list-style-type: none"> <li>• H05.12x Orbital myositis</li> <li>• M33.03 Dermatomyositis, juvenile without myopathy</li> <li>• M33.13 Other dermatomyositis without myopathy</li> <li>• M33.2 Polymyositis</li> <li>• M33.9 Dermatopolymyositis, unspecified</li> <li>• M60.1 Interstitial myositis</li> <li>• M60.8 Other myositis</li> <li>• M60.9 Myositis, unspecified</li> <li>• M79.1 Other and unspecified soft tissue disorders, not elsewhere classified Myalgia</li> </ul> |

|                                                           |                                                                                                                                                                                                                                                                                                                                                                                                                                                                                                       |                                                                                                                                                                                                                                                                                                                                                                                                                                                                                                                                                                                                                  |
|-----------------------------------------------------------|-------------------------------------------------------------------------------------------------------------------------------------------------------------------------------------------------------------------------------------------------------------------------------------------------------------------------------------------------------------------------------------------------------------------------------------------------------------------------------------------------------|------------------------------------------------------------------------------------------------------------------------------------------------------------------------------------------------------------------------------------------------------------------------------------------------------------------------------------------------------------------------------------------------------------------------------------------------------------------------------------------------------------------------------------------------------------------------------------------------------------------|
|                                                           |                                                                                                                                                                                                                                                                                                                                                                                                                                                                                                       | <ul style="list-style-type: none"> <li>• M79.7 Other and unspecified soft tissue disorders, not elsewhere classified<br/>Fibromyalgia</li> </ul>                                                                                                                                                                                                                                                                                                                                                                                                                                                                 |
| Psoriatic arthropathy                                     | <ul style="list-style-type: none"> <li>• 696.0 Psoriatic arthropathy</li> </ul>                                                                                                                                                                                                                                                                                                                                                                                                                       | <ul style="list-style-type: none"> <li>• L40.5x Arthropathic psoriasis</li> </ul>                                                                                                                                                                                                                                                                                                                                                                                                                                                                                                                                |
| Psoriasis, other                                          | <ul style="list-style-type: none"> <li>• 696.1 Other psoriasis</li> </ul>                                                                                                                                                                                                                                                                                                                                                                                                                             | <ul style="list-style-type: none"> <li>• L40.0 Psoriasis vulgaris</li> <li>• L40.1 Generalized pustular psoriasis</li> <li>• L40.2 Acrodermatitis continua</li> <li>• L40.3 Pustulosis palmaris et plantaris</li> <li>• L40.4 Guttate psoriasis</li> <li>• L40.8 Other psoriasis</li> <li>• L40.9 Psoriasis, unspecified</li> </ul>                                                                                                                                                                                                                                                                              |
| Other unspecified systemic disorders of connective tissue | <ul style="list-style-type: none"> <li>• 710.5 Eosinophilia myalgia syndrome</li> <li>• 710.8 Other specified diffuse diseases of connective tissue</li> <li>• 710.9 Unspecified diffuse connective tissue disease</li> <li>• 713.8 Arthropathy associated with other conditions classifiable elsewhere</li> <li>• 716.20 Allergic arthritis, site unspecified</li> <li>• 716.50 unspecified polyarthropathy or polyarthritis, site unspecified</li> <li>• 716.6 Unspecified monoarthritis</li> </ul> | <ul style="list-style-type: none"> <li>• M13.0 polyarthritis, unspecified</li> <li>• M13.1 Monoarthritis, not elsewhere classified</li> <li>• M13.8 Other specified arthritis</li> <li>• M35.1 Other overlap syndromes</li> <li>• M35.8 Other specified systemic involvement of connective tissue, unspecified</li> <li>• M35.9 Systemic involvement of connective tissue, unspecified</li> <li>• M36.0 Demato(poly)myositis in neoplastic disease</li> <li>• M36.1 Arthropathy in neoplastic disease</li> <li>• M38.8 Systemic disorders of connective tissue in other diseases classified elsewhere</li> </ul> |
| Rheumatoid arthritis                                      | <ul style="list-style-type: none"> <li>• 714 Rheumatoid arthritis and other inflammatory polyarthropathies</li> </ul>                                                                                                                                                                                                                                                                                                                                                                                 | <ul style="list-style-type: none"> <li>• M05 Rheumatoid arthritis with rheumatoid factor</li> <li>• M06 Other rheumatoid arthritis</li> </ul>                                                                                                                                                                                                                                                                                                                                                                                                                                                                    |
| Sarcoidosis                                               | <ul style="list-style-type: none"> <li>• 135 Sarcoidosis</li> </ul>                                                                                                                                                                                                                                                                                                                                                                                                                                   | <ul style="list-style-type: none"> <li>• D86 Sarcoidosis</li> </ul>                                                                                                                                                                                                                                                                                                                                                                                                                                                                                                                                              |

|                                                                                                                                                                                                                                                                      |                                                                                                                                                                                                                                                                                                                                           |                                                                                                                                                                                                                                                                                                                                                                                                                                                                                                                                    |
|----------------------------------------------------------------------------------------------------------------------------------------------------------------------------------------------------------------------------------------------------------------------|-------------------------------------------------------------------------------------------------------------------------------------------------------------------------------------------------------------------------------------------------------------------------------------------------------------------------------------------|------------------------------------------------------------------------------------------------------------------------------------------------------------------------------------------------------------------------------------------------------------------------------------------------------------------------------------------------------------------------------------------------------------------------------------------------------------------------------------------------------------------------------------|
| Scleroderma/Systemic sclerosis                                                                                                                                                                                                                                       | <ul style="list-style-type: none"> <li>• 710.1 Systemic sclerosis</li> </ul>                                                                                                                                                                                                                                                              | <ul style="list-style-type: none"> <li>• M34 Systemic sclerosis [scleroderma]</li> </ul>                                                                                                                                                                                                                                                                                                                                                                                                                                           |
| Sjögren's syndrome                                                                                                                                                                                                                                                   | <ul style="list-style-type: none"> <li>• 375.15 Tear film insufficiency, unspecified</li> <li>• 710.2 Sicca syndrome</li> </ul>                                                                                                                                                                                                           | <ul style="list-style-type: none"> <li>• H04.12 Dry eye syndrome</li> <li>• M35.0 Sicca syndrome [Sjögren]</li> </ul>                                                                                                                                                                                                                                                                                                                                                                                                              |
| Systemic lupus erythematosus                                                                                                                                                                                                                                         | <ul style="list-style-type: none"> <li>• 710.0 Systemic lupus erythematosus</li> </ul>                                                                                                                                                                                                                                                    | <ul style="list-style-type: none"> <li>• M32 Systemic lupus erythematosus (SLE)</li> </ul>                                                                                                                                                                                                                                                                                                                                                                                                                                         |
| Thyroid disease                                                                                                                                                                                                                                                      | <ul style="list-style-type: none"> <li>• 240 Simple and unspecified goiter</li> <li>• 241 Nontoxic nodular goiter</li> <li>• 242 Thyrotoxicosis with or without goiter</li> <li>• 244 Acquired hypothyroidism</li> <li>• 245 Thyroiditis</li> <li>• 246 Other disorders of thyroid</li> <li>• 376.30 Exophthalmos, unspecified</li> </ul> | <ul style="list-style-type: none"> <li>• E03.2 Hypothyroidism due to medicaments and other exogenous substances</li> <li>• E03.4 Atrophy of thyroid (acquired)</li> <li>• E03.8 Other specified hypothyroidism</li> <li>• E03.9 Hypothyroidism, unspecified</li> <li>• E04 Other nontoxic goiter</li> <li>• E05 Thyrotoxicosis [hyperthyroidism]</li> <li>• E06 Thyroiditis</li> <li>• E07.89 Other specified disorders of thyroid</li> <li>• E07.9 Other disorders of thyroid</li> <li>• H05.2 Exophthalmic conditions</li> </ul> |
| Type 1 diabetes                                                                                                                                                                                                                                                      | <ul style="list-style-type: none"> <li>• 250.x1 Diabetes type I [juvenile type], not stated as uncontrolled</li> <li>• 250.x3 Diabetes type I [juvenile type], uncontrolled</li> </ul>                                                                                                                                                    | <ul style="list-style-type: none"> <li>• E10 Type 1 diabetes mellitus</li> </ul>                                                                                                                                                                                                                                                                                                                                                                                                                                                   |
| Ulcerative colitis                                                                                                                                                                                                                                                   | <ul style="list-style-type: none"> <li>• 556 Ulcerative colitis</li> </ul>                                                                                                                                                                                                                                                                | <ul style="list-style-type: none"> <li>• K51 Ulcerative colitis</li> </ul>                                                                                                                                                                                                                                                                                                                                                                                                                                                         |
| <p><i>Abbreviations: ICD-9-CM, International Classification of Diseases, 9<sup>th</sup> Revision, Clinical Modification; ICD-10-CM, International Classification of Diseases, 10<sup>th</sup> Revision, Clinical Modification; NOS, not otherwise specified.</i></p> |                                                                                                                                                                                                                                                                                                                                           |                                                                                                                                                                                                                                                                                                                                                                                                                                                                                                                                    |

**Supplementary Table 2.** LOINC codes for laboratory values and vital signs

| <b>Laboratory Tests/Vital Signs</b> | <b>LOINC Codes</b>              | <b>SNOMED Codes</b> |
|-------------------------------------|---------------------------------|---------------------|
| <b>Vital Signs</b>                  |                                 |                     |
| Temperature                         | 8310-5                          | 386725007           |
| Pulse                               |                                 | 78564009            |
| Respiratory Rate                    | 9279-1                          | 86290005            |
| O <sub>2</sub> Saturation           | 20564-1, 2711-0                 |                     |
| Systolic Blood Pressure             |                                 | 271649006           |
| Diastolic Blood Pressure            |                                 | 271650006           |
| Weight                              | 29463-7, 3141-9                 | 27113001            |
| Body Mass Index                     |                                 | 60621009            |
| <b>Basic Metabolic Panel</b>        |                                 |                     |
| Sodium                              | 2951-2                          |                     |
| Potassium                           | 2823-3                          |                     |
| Chloride                            | 2075-0                          |                     |
| Bicarbonate                         | 2028-9                          |                     |
| Creatinine                          | 2160-0                          |                     |
| Blood urea nitrogen                 | 3094-0                          |                     |
| Magnesium                           | 19123-9                         |                     |
| Calcium                             | 17861-6                         |                     |
| Phosphorous                         | 2777-1                          |                     |
| <b>Complete Blood Count Panel</b>   |                                 |                     |
| White Blood Cell Count              | 6690-2, 26464-8                 |                     |
| Platelets                           | 777-3, 26515-7                  |                     |
| Hemoglobin                          | 718-7                           |                     |
| Hematocrit                          | 4544-3                          |                     |
| % Neutrophils                       | 770-8, 26511-6                  |                     |
| % Eosinophils                       | 713-8, 714-6,<br>26450-7        |                     |
| % Lymphocytes                       | 737-7, 731-0, 736-9,<br>26478-8 |                     |
| <b>Liver Function Tests</b>         |                                 |                     |
| Aspartate Aminotransferase          | 1920-8                          |                     |
| Alanine Aminotransferase            | 1742-6                          |                     |
| Alkaline Phosphatase                | 6768-6                          |                     |
| Total Bilirubin                     | 1975-2                          |                     |
| Direct Bilirubin                    | 1968-7, 15152-2                 |                     |
| Indirect Bilirubin                  | 1971-1                          |                     |
| <b>Lactate Dehydrogenase</b>        | 2532-0, 14804-9                 |                     |
| <b>Cardiac Enzymes</b>              |                                 |                     |

|                                                                                                                                                                                |                                   |  |
|--------------------------------------------------------------------------------------------------------------------------------------------------------------------------------|-----------------------------------|--|
| Troponin                                                                                                                                                                       | 10839-9, 42757-5, 6598-7, 49563-0 |  |
| BNP                                                                                                                                                                            | 30934-4                           |  |
| ProBNP                                                                                                                                                                         | 33762-6                           |  |
| <b>Inflammatory Markers</b>                                                                                                                                                    |                                   |  |
| Erythrocyte sedimentation rate                                                                                                                                                 | 4537-7, 30341-2, 43402-7          |  |
| C-reactive protein                                                                                                                                                             | 1988-5, 30522-7                   |  |
| <b>Coagulation Factors</b>                                                                                                                                                     |                                   |  |
| Prothrombin Time                                                                                                                                                               | 5902-2                            |  |
| Partial Thromboplastin Time                                                                                                                                                    | 14979-9                           |  |
| International Normalized Ratio                                                                                                                                                 | 34714-6                           |  |
| <b>D-dimer and Fibrinogen Split Products</b>                                                                                                                                   |                                   |  |
| D-Dimer                                                                                                                                                                        | 48065-7                           |  |
| Fibrinogen                                                                                                                                                                     | 3255-7                            |  |
| <i>Abbreviations:</i> BNP, B-type natriuretic peptide; LOINC, Logical Observation Identifiers Names and Codes; <i>SNOMED</i> , <i>Systematized Nomenclature, of Medicine</i> . |                                   |  |

**Supplementary Table 3.** Description of Model Variables

| <b>Characteristic</b>               | <b>Missing</b> | <b>Mean (SD)</b> |
|-------------------------------------|----------------|------------------|
| Age                                 | 818            | 64.7 (10.8)      |
| Weight Change                       | 1952           | -0.1 (0.3)       |
| ECOG Performance Score              | 1406           | 1.1 (0.8)        |
|                                     |                |                  |
| <b>Laboratory Values, mean (SD)</b> |                | <b>Mean (SD)</b> |
| Alkaline Phosphatase                | 223            | 105.0<br>(67.5)  |
| Alanine Aminotransferase            | 251            | 24.3 (28.3)      |
| Aspartate Aminotransferase          | 284            | 24.7 (24.2)      |
| B-type Natriuretic Peptide          | 4907           | 506.5<br>(966.6) |
| Blood Urine Nitrogen                | 241            | 16.8 (8.1)       |
| Calcium                             | 3232           | 9.3 (0.6)        |
| Chloride                            | 238            | 101.3 (4.5)      |
| Creatinine                          | 2712           | 1.0 (0.4)        |
| C-Reactive Protein                  | 4872           | 75.3 (78.2)      |
| D-Dimer                             | 4946           | 46.4<br>(192.9)  |
| Direct Bilirubin                    | 4524           | 0.2 (0.6)        |
| Eosinophils Percent                 | 1089           | 2.3 (3.2)        |
| Erythrocyte Sedimentation Rate      | 4950           | 56.9 (37.9)      |
| Fibrinogen                          | 4941           | 426.8<br>(184.0) |
| Hemoglobin                          | 188            | 11.8 (2.0)       |
| Bicarbonate                         | 3811           | 27.0 (5.3)       |
| Hematocrit                          | 4884           | 35.3 (5.5)       |
| Indirect Bilirubin                  | 4950           | 0.5 (0.4)        |
| International Normalized Ratio      | 4366           | 1.2 (0.7)        |
| Potassium                           | 211            | 4.2 (0.5)        |
| Lactate Dehydrogenase               | 3125           | 287.4<br>(273.2) |
| Lymphocytes Percent                 | 1081           | 17.8 (10.4)      |
| Magnesium                           | 2809           | 1.9 (0.3)        |
| Sodium                              | 202            | 138.1 (3.7)      |
| Neutrophils Percent                 | 688            | 70.0 (12.8)      |
| Phosphate                           | 4285           | 3.5 (0.7)        |

|                                           |     |      |                   |
|-------------------------------------------|-----|------|-------------------|
| Platelets                                 |     | 270  | 263.5<br>(113.8)  |
| N-Terminal Pro-B-Type Natriuretic Peptide |     | 4946 | 656.4<br>(1237.8) |
| Prothrombin Time                          |     | 3664 | 13.6 (5.8)        |
| Partial Thromboplastin Time               |     | 4613 | 30.4 (8.4)        |
| Total bilirubin                           |     | 363  | 0.5 (0.4)         |
| Troponin                                  |     | 4904 | 0.1 (0.5)         |
| White Blood Cells                         |     | 851  | 8.3 (4.7)         |
|                                           |     |      |                   |
| <b>Vital Signs, mean (SD)</b>             |     |      | Mean (SD)         |
| Body Mass Index                           |     | 1496 | 26.3 (6.2)        |
| Diastolic Blood Pressure                  |     | 1381 | 72.5 (11.0)       |
| Heart Rate                                |     | 1189 | 86.3 (17.5)       |
| Respiratory Rate                          |     | 581  | 17.4 (2.1)        |
| Systolic Blood Pressure                   |     | 1381 | 126.3<br>(19.2)   |
| Temperature                               |     | 485  | 97.7 (0.7)        |
| Weight                                    |     | 1912 | 167.2<br>(44.9)   |
|                                           |     |      |                   |
| <b>Characteristic, n (%)</b>              |     |      |                   |
| Number of Immunotherapies                 | 1   | 0    | 4739 (95.5)       |
|                                           | 2   |      | 215 (4.3)         |
|                                           | 3   |      | 6 (0.1)           |
| Chest RT                                  | 0   | 0    | 3794 (75.4)       |
|                                           | 1   |      | 1166 (24.6)       |
| Charlson Co-morbidity Index               | 0   | 0    | 6 (0.1)           |
|                                           | 2-3 |      | 683 (13.8)        |
|                                           | 3+  |      | 4278 (86.1)       |
| Male                                      | 0   | 0    | 2252 (45.3)       |
|                                           | 1   |      | 2715 (54.7)       |
|                                           |     |      |                   |
| <b>Medication, n (%)</b>                  |     |      |                   |
| 5-Alpha Reductase Inhibitor, n (%)        | 0   | 0    | 4934 (99.5)       |
|                                           | 1+  |      | 27 (0.5)          |
| Adenosine Receptor Agonist, n (%)         | 0   | 0    | 4948 (99.7)       |



|                                                |    |   |             |
|------------------------------------------------|----|---|-------------|
|                                                | 1+ |   | 13 (0.3)    |
| Aldosterone Antagonist, n (%)                  | 0  | 0 | 4910 (99.0) |
|                                                | 1+ |   | 51 (1.0)    |
| Alkylating Drug, n (%)                         | 0  | 0 | 4925 (99.3) |
|                                                | 1+ |   | 36 (0.7)    |
| Aluminum Complex, n (%)                        | 0  | 0 | 4907 (98.9) |
|                                                | 1+ |   | 54 (1.1)    |
| Amide Local Anesthetic, n (%)                  | 0  | 0 | 4865 (98.1) |
|                                                | 1+ |   | 96 (1.9)    |
| Aminoglycoside Antibacterial, n (%)            | 0  | 0 | 4927 (99.3) |
|                                                | 1+ |   | 34 (0.7)    |
| Aminoketone, n (%)                             | 0  | 0 | 4870 (98.2) |
|                                                | 1+ |   | 91 (1.8)    |
| Aminosalicylate, n (%)                         | 0  | 0 | 4957 (99.9) |
|                                                | 1+ |   | 4 (0.1)     |
| Androgen Receptor Inhibitor, n (%)             | 0  | 0 | 4951 (99.8) |
|                                                | 1+ |   | 10 (0.2)    |
| Angiotensin 2 Receptor Blocker, n (%)          | 0  | 0 | 4790 (96.6) |
|                                                | 1+ |   | 171 (3.4)   |
| Angiotensin Converting Enzyme Inhibitor, n (%) | 0  | 0 | 4623 (93.2) |
|                                                | 1+ |   | 338 (6.8)   |
| Anthracycline Topoisomerase Inhibitor, n (%)   | 0  | 0 | 4946 (99.7) |
|                                                | 1+ |   | 15 (0.3)    |
| Anti-Epileptic Agent, n (%)                    | 0  | 0 | 4784 (96.4) |
|                                                | 1+ |   | 177 (3.6)   |
| Antiarrhythmic, n (%)                          | 0  | 0 | 4523 (91.2) |
|                                                | 1+ |   | 438 (8.8)   |
| Anticholinergic, n (%)                         | 0  | 0 | 4403 (88.8) |
|                                                | 1+ |   | 558 (11.2)  |
| Antiemetic, n (%)                              | 0  | 0 | 4933 (99.4) |
|                                                | 1+ |   | 28 (0.6)    |
| Antihistamine, n (%)                           | 0  | 0 | 4944 (99.7) |
|                                                | 1+ |   | 17 (0.3)    |
| Antihypoglycemic Agent, n (%)                  | 0  | 0 | 4931 (99.4) |
|                                                | 1+ |   | 30 (0.6)    |
| Antimalarial, n (%)                            | 0  | 0 | 4957 (99.9) |

|                                         |    |   |              |
|-----------------------------------------|----|---|--------------|
|                                         | 1+ |   | 4 (0.1)      |
| Antimycobacterial, n (%)                | 0  | 0 | 4956 (99.9)  |
|                                         | 1+ |   | 5 (0.1)      |
| Antirheumatic Agent, n (%)              | 0  | 0 | 4959 (100.0) |
|                                         | 1+ |   | 2 (0.0)      |
| Antiseptic, n (%)                       | 0  | 0 | 4945 (99.7)  |
|                                         | 1+ |   | 16 (0.3)     |
| Aromatase Inhibitor, n (%)              | 0  | 0 | 4918 (99.1)  |
|                                         | 1+ |   | 43 (0.9)     |
| Arteriolar Vasodilator, n (%)           | 0  | 0 | 4751 (95.8)  |
|                                         | 1+ |   | 210 (4.2)    |
| Atypical Antipsychotic, n (%)           | 0  | 0 | 4878 (98.3)  |
|                                         | 1+ |   | 83 (1.7)     |
| Azole Antifungal, n (%)                 | 0  | 0 | 4850 (97.8)  |
|                                         | 1+ |   | 111 (2.2)    |
| Barbiturate, n (%)                      | 0  | 0 | 4947 (99.7)  |
|                                         | 1+ |   | 14 (0.3)     |
| Benzodiazepine, n (%)                   | 0  | 0 | 4455 (89.8)  |
|                                         | 1+ |   | 506 (10.2)   |
| Benzodiazepine Antagonist, n (%)        | 0  | 0 | 4957 (99.9)  |
|                                         | 1+ |   | 4 (0.1)      |
| Biguanide, n (%)                        | 0  | 0 | 4917 (99.1)  |
|                                         | 1+ |   | 44 (0.9)     |
| Bile Acid, n (%)                        | 0  | 0 | 4957 (99.9)  |
|                                         | 1+ |   | 4 (0.1)      |
| Bile Acid Sequestrant, n (%)            | 0  | 0 | 4957 (99.9)  |
|                                         | 1+ |   | 4 (0.1)      |
| Bismuth, n (%)                          | 0  | 0 | 4956 (99.9)  |
|                                         | 1+ |   | 5 (0.1)      |
| Bisphosphonate, n (%)                   | 0  | 0 | 4569 (92.1)  |
|                                         | 1+ |   | 392 (7.9)    |
| Blood Coagulation Factor, n (%)         | 0  | 0 | 4936 (99.5)  |
|                                         | 1+ |   | 25 (0.5)     |
| Cd20-Directed Cytolytic Antibody, n (%) | 0  | 0 | 4941 (99.6)  |
|                                         | 1+ |   | 20 (0.4)     |

|                                                |    |   |              |
|------------------------------------------------|----|---|--------------|
| Ctla-4-Directed Blocking Antibody, n (%)       | 0  | 0 | 4746 (95.7)  |
|                                                | 1+ |   | 215 (4.3)    |
| Calcineurin Inhibitor Immunosuppressant, n (%) | 0  | 0 | 4956 (99.9)  |
|                                                | 1+ |   | 5 (0.1)      |
| Calcitonin, n (%)                              | 0  | 0 | 4957 (99.9)  |
|                                                | 1+ |   | 4 (0.1)      |
| Calcium Channel Blocker, n (%)                 | 0  | 0 | 4873 (98.2)  |
|                                                | 1+ |   | 88 (1.8)     |
| Calcium-Sensing Receptor Agonist, n (%)        | 0  | 0 | 4959 (100.0) |
|                                                | 1+ |   | 2 (0.0)      |
| Cannabinoid, n (%)                             | 0  | 0 | 4924 (99.3)  |
|                                                | 1+ |   | 37 (0.7)     |
| Carbonic Anhydrase Inhibitor, n (%)            | 0  | 0 | 4956 (99.9)  |
|                                                | 1+ |   | 5 (0.1)      |
| Cardiac Glycoside, n (%)                       | 0  | 0 | 4945 (99.7)  |
|                                                | 1+ |   | 16 (0.3)     |
| Catecholamine, n (%)                           | 0  | 0 | 4958 (99.9)  |
|                                                | 1+ |   | 3 (0.1)      |
| Central Nervous System Stimulant, n (%)        | 0  | 0 | 4940 (99.6)  |
|                                                | 1+ |   | 21 (0.4)     |
| Central Alpha-2 Adrenergic Agonist, n (%)      | 0  | 0 | 4939 (99.6)  |
|                                                | 1+ |   | 22 (0.4)     |
| Cephalosporin Antibacterial, n (%)             | 0  | 0 | 4539 (91.5)  |
|                                                | 1+ |   | 422 (8.5)    |
| Cholinergic Muscarinic Agonist, n (%)          | 0  | 0 | 4867 (98.1)  |
|                                                | 1+ |   | 94 (1.9)     |
| Cholinergic Muscarinic Antagonist, n (%)       | 0  | 0 | 4938 (99.5)  |
|                                                | 1+ |   | 23 (0.5)     |
| Cholinergic Nicotinic Agonist, n (%)           | 0  | 0 | 4909 (99.0)  |
|                                                | 1+ |   | 52 (1.0)     |
| Cholinergic Receptor Agonist, n (%)            | 0  | 0 | 4957 (99.9)  |
|                                                | 1+ |   | 4 (0.1)      |
| Cholinesterase Inhibitor, n (%)                | 0  | 0 | 4841 (97.6)  |
|                                                | 1+ |   | 120 (2.4)    |
| Corticosteroid, n (%)                          | 0  | 0 | 1153 (23.2)  |
|                                                | 1+ |   |              |

|                                                        |    |   |             |
|--------------------------------------------------------|----|---|-------------|
|                                                        | 1+ |   | 3808 (76.8) |
| Depolarizing Neuromuscular Blocker, n (%)              | 0  | 0 | 4914 (99.1) |
|                                                        | 1+ |   | 47 (0.9)    |
| Dietary Cholesterol Absorption Inhibitor, n (%)        | 0  | 0 | 4953 (99.8) |
|                                                        | 1+ |   | 8 (0.2)     |
| Dihydropyridine Calcium Channel Blocker, n (%)         | 0  | 0 | 4785 (96.5) |
|                                                        | 1+ |   | 176 (3.5)   |
| Dipeptidyl Peptidase 4 Inhibitor, n (%)                | 0  | 0 | 4951 (99.8) |
|                                                        | 1+ |   | 10 (0.2)    |
| Dopamine-2 Receptor Antagonist, n (%)                  | 0  | 0 | 4908 (98.9) |
|                                                        | 1+ |   | 53 (1.1)    |
| Epidermal Growth Factor Receptor Antagonist, n (%)     | 0  | 0 | 4925 (99.3) |
|                                                        | 1+ |   | 36 (0.7)    |
| Erythropoiesis-Stimulating Agent, n (%)                | 0  | 0 | 4885 (98.5) |
|                                                        | 1+ |   | 76 (1.5)    |
| Ester Local Anesthetic, n (%)                          | 0  | 0 | 4956 (99.9) |
|                                                        | 1+ |   | 5 (0.1)     |
| Estrogen Agonist/Antagonist, n (%)                     | 0  | 0 | 4947 (99.7) |
|                                                        | 1+ |   | 14 (0.3)    |
| Factor Xa Inhibitor, n (%)                             | 0  | 0 | 4919 (99.2) |
|                                                        | 1+ |   | 42 (0.8)    |
| Folate Analog, n (%)                                   | 0  | 0 | 4949 (99.8) |
|                                                        | 1+ |   | 12 (0.2)    |
| Folate Analog Metabolic Inhibitor, n (%)               | 0  | 0 | 3108 (62.6) |
|                                                        | 1+ |   | 1853 (37.4) |
| General Anesthetic, n (%)                              | 0  | 0 | 4769 (96.1) |
|                                                        | 1+ |   | 192 (3.9)   |
| Glycopeptide Antibacterial, n (%)                      | 0  | 0 | 4885 (98.5) |
|                                                        | 1+ |   | 76 (1.5)    |
| Gonadotropin Releasing Hormone Receptor Agonist, n (%) | 0  | 0 | 4945 (99.7) |
|                                                        | 1+ |   | 16 (0.3)    |
| Her2/Neu Receptor Antagonist, n (%)                    | 0  | 0 | 4948 (99.7) |
|                                                        | 1+ |   | 13 (0.3)    |
| Hmg-Coa Reductase Inhibitor, n (%)                     | 0  | 0 | 4722 (95.2) |
|                                                        | 1+ |   | 239 (4.8)   |
|                                                        | 0  | 0 | 4920 (99.2) |

|                                                               |    |   |             |
|---------------------------------------------------------------|----|---|-------------|
| Herpesvirus Nucleoside Analog Dna Polymerase Inhibitor, n (%) | 1+ |   | 41 (0.8)    |
| Histamine-1 Receptor Antagonist, n (%)                        | 0  | 0 | 2461 (49.6) |
|                                                               | 1+ |   | 2500 (50.4) |
| Histamine-2 Receptor Antagonist, n (%)                        | 0  | 0 | 4653 (93.8) |
|                                                               | 1+ |   | 308 (6.2)   |
| Human Serum Albumin, n (%)                                    | 0  | 0 | 4951 (99.8) |
|                                                               | 1+ |   | 10 (0.2)    |
| Insulin, n (%)                                                | 0  | 0 | 4916 (99.1) |
|                                                               | 1+ |   | 45 (0.9)    |
| Insulin Analog, n (%)                                         | 0  | 0 | 4883 (98.4) |
|                                                               | 1+ |   | 78 (1.6)    |
| Interferon Alpha, n (%)                                       | 0  | 0 | 4949 (99.8) |
|                                                               | 1+ |   | 12 (0.2)    |
| Kinase Inhibitor, n (%)                                       | 0  | 0 | 4341 (87.5) |
|                                                               | 1+ |   | 620 (12.5)  |
| Leukocyte Growth Factor, n (%)                                | 0  | 0 | 4119 (83.0) |
|                                                               | 1+ |   | 842 (17.0)  |
| Leukotriene Receptor Antagonist, n (%)                        | 0  | 0 | 4939 (99.6) |
|                                                               | 1+ |   | 22 (0.4)    |
| Lincosamide Antibacterial, n (%)                              | 0  | 0 | 4836 (97.5) |
|                                                               | 1+ |   | 125 (2.5)   |
| Lipid Emulsion, n (%)                                         | 0  | 0 | 4954 (99.9) |
|                                                               | 1+ |   | 7 (0.1)     |
| Loop Diuretic, n (%)                                          | 0  | 0 | 4354 (87.8) |
|                                                               | 1+ |   | 607 (12.2)  |
| Low Molecular Weight Heparin, n (%)                           | 0  | 0 | 4690 (94.5) |
|                                                               | 1+ |   | 271 (5.5)   |
| Lymphocyte Growth Factor, n (%)                               | 0  | 0 | 4948 (99.7) |
|                                                               | 1+ |   | 13 (0.3)    |
| Macrolide, n (%)                                              | 0  | 0 | 4951 (99.8) |
|                                                               | 1+ |   | 10 (0.2)    |
| Macrolide Antimicrobial, n (%)                                | 0  | 0 | 4863 (98.0) |
|                                                               | 1+ |   | 98 (2.0)    |
| Microtubule Inhibitor, n (%)                                  | 0  | 0 | 3237 (65.2) |
|                                                               | 1+ |   | 1724 (34.8) |

|                                                 |    |   |                 |
|-------------------------------------------------|----|---|-----------------|
| Mood Stabilizer, n (%)                          | 0  | 0 | 4951 (99.8)     |
|                                                 | 1+ |   | 10 (0.2)        |
| Muscle Relaxant, n (%)                          | 0  | 0 | 4845 (97.7)     |
|                                                 | 1+ |   | 116 (2.3)       |
| N-Methyl-D-Aspartate Receptor Antagonist, n (%) | 0  | 0 | 4948 (99.7)     |
|                                                 | 1+ |   | 13 (0.3)        |
| Neuraminidase Inhibitor, n (%)                  | 0  | 0 | 4929 (99.4)     |
|                                                 | 1+ |   | 32 (0.6)        |
| Nicotinic Acid, n (%)                           | 0  | 0 | 4954 (99.9)     |
|                                                 | 1+ |   | 7 (0.1)         |
| Nitrate Vasodilator, n (%)                      | 0  | 0 | 4889 (98.5)     |
|                                                 | 1+ |   | 72 (1.5)        |
| Nitrofurantoin Antibacterial, n (%)             | 0  | 0 | 4958 (99.9)     |
|                                                 | 1+ |   | 3 (0.1)         |
| Nitroimidazole Antimicrobial, n (%)             | 0  | 0 | 4900 (98.8)     |
|                                                 | 1+ |   | 61 (1.2)        |
| Non-Standardized Chemical Allergen, n (%)       | 0  | 0 | 4956 (99.9)     |
|                                                 | 1+ |   | 5 (0.1)         |
| Non-Narcotic Antitussive, n (%)                 | 0  | 0 | 4832 (97.4)     |
|                                                 | 1+ |   | 129 (2.6)       |
| Nondepolarizing Neuromuscular Blocker, n (%)    | 0  | 0 | 4842 (97.6)     |
|                                                 | 1+ |   | 119 (2.4)       |
| Nonergot Dopamine Agonist, n (%)                | 0  | 0 | 4948 (99.7)     |
|                                                 | 1+ |   | 13 (0.3)        |
| Nonsteroidal Anti-Inflammatory Drug, n (%)      | 0  | 0 | 4524 (91.2)     |
|                                                 | 1+ |   | 437 (8.8)       |
| Nucleoside Analog Antiviral, n (%)              | 0  | 0 | 4959<br>(100.0) |
|                                                 | 1+ |   | 2 (0.0)         |
| Nucleoside Metabolic Inhibitor, n (%)           | 0  | 0 | 4549 (91.7)     |
|                                                 | 1+ |   | 412 (8.3)       |
| Opioid Agonist, n (%)                           | 0  | 0 | 2390 (48.2)     |
|                                                 | 1+ |   | 2571 (51.8)     |
| Opioid Agonist/Antagonist, n (%)                | 0  | 0 | 4941 (99.6)     |
|                                                 | 1+ |   | 20 (0.4)        |
| Opioid Antagonist, n (%)                        | 0  | 0 | 4607 (92.9)     |

|                                              |    |   |              |
|----------------------------------------------|----|---|--------------|
|                                              | 1+ |   | 354 (7.1)    |
| Osmotic Laxative, n (%)                      | 0  | 0 | 4784 (96.4)  |
|                                              | 1+ |   | 177 (3.6)    |
| Oxidation-Reduction Agent, n (%)             | 0  | 0 | 4953 (99.8)  |
|                                              | 1+ |   | 8 (0.2)      |
| P2Y12 Platelet Inhibitor, n (%)              | 0  | 0 | 4922 (99.2)  |
|                                              | 1+ |   | 39 (0.8)     |
| Parenteral Iron Replacement, n (%)           | 0  | 0 | 4957 (99.9)  |
|                                              | 1+ |   | 4 (0.1)      |
| Partial Cholinergic Nicotinic Agonist, n (%) | 0  | 0 | 4948 (99.7)  |
|                                              | 1+ |   | 13 (0.3)     |
| Partial Opioid Agonist, n (%)                | 0  | 0 | 4959 (100.0) |
|                                              | 1+ |   | 2 (0.0)      |
| Penem Antibacterial, n (%)                   | 0  | 0 | 4959 (100.0) |
|                                              | 1+ |   | 2 (0.0)      |
| Penicillin-Class Antibacterial, n (%)        | 0  | 0 | 4824 (97.2)  |
|                                              | 1+ |   | 137 (2.8)    |
| Phenothiazine, n (%)                         | 0  | 0 | 3786 (76.3)  |
|                                              | 1+ |   | 1175 (23.7)  |
| Phosphate Binder, n (%)                      | 0  | 0 | 4958 (99.9)  |
|                                              | 1+ |   | 3 (0.1)      |
| Phosphodiesterase 3 Inhibitor, n (%)         | 0  | 0 | 4956 (99.9)  |
|                                              | 1+ |   | 5 (0.1)      |
| Phosphodiesterase 5 Inhibitor, n (%)         | 0  | 0 | 4938 (99.5)  |
|                                              | 1+ |   | 23 (0.5)     |
| Platelet Aggregation Inhibitor, n (%)        | 0  | 0 | 4634 (93.4)  |
|                                              | 1+ |   | 327 (6.6)    |
| Platinum-Based Drug, n (%)                   | 0  | 0 | 1680 (33.9)  |
|                                              | 1+ |   | 3281 (66.1)  |
| Poly(Adp-Ribose) Polymerase Inhibitor, n (%) | 0  | 0 | 4958 (99.9)  |
|                                              | 1+ |   | 3 (0.1)      |
| Polyene Antifungal, n (%)                    | 0  | 0 | 4884 (98.4)  |
|                                              | 1+ |   | 77 (1.6)     |
| Polymyxin-Class Antibacterial, n (%)         | 0  | 0 | 4956 (99.9)  |

|                                                        |    |   |              |
|--------------------------------------------------------|----|---|--------------|
|                                                        | 1+ |   | 5 (0.1)      |
| Potassium-Sparing Diuretic, n (%)                      | 0  | 0 | 4922 (99.2)  |
|                                                        | 1+ |   | 39 (0.8)     |
| Progestin, n (%)                                       | 0  | 0 | 4678 (94.3)  |
|                                                        | 1+ |   | 283 (5.7)    |
| Programmed Death Ligand-1 Blocker, n (%)               | 0  | 0 | 4841 (97.6)  |
|                                                        | 1+ |   | 120 (2.4)    |
| Programmed Death Receptor-1 Blocking Antibody, n (%)   | 0  | 0 | 110 (2.2)    |
|                                                        | 1+ |   | 4851 (97.8)  |
| Proteasome Inhibitor, n (%)                            | 0  | 0 | 4957 (99.9)  |
|                                                        | 1+ |   | 4 (0.1)      |
| Proton Pump Inhibitor, n (%)                           | 0  | 0 | 4626 (93.2)  |
|                                                        | 1+ |   | 335 (6.8)    |
| Provitamin D2 Compound, n (%)                          | 0  | 0 | 4934 (99.5)  |
|                                                        | 1+ |   | 27 (0.5)     |
| Quinolone Antimicrobial, n (%)                         | 0  | 0 | 4228 (85.2)  |
|                                                        | 1+ |   | 733 (14.8)   |
| Rank Ligand Inhibitor, n (%)                           | 0  | 0 | 4851 (97.8)  |
|                                                        | 1+ |   | 110 (2.2)    |
| Rna Synthetase Inhibitor Antibacterial, n (%)          | 0  | 0 | 4934 (99.5)  |
|                                                        | 1+ |   | 27 (0.5)     |
| Radiographic Contrast Agent, n (%)                     | 0  | 0 | 4885 (98.5)  |
|                                                        | 1+ |   | 76 (1.5)     |
| Recombinant Human Deoxyribonuclease 1, n (%)           | 0  | 0 | 4959 (100.0) |
|                                                        | 1+ |   | 2 (0.0)      |
| Rifamycin Antibacterial, n (%)                         | 0  | 0 | 4956 (99.9)  |
|                                                        | 1+ |   | 5 (0.1)      |
| Serotonin Reuptake Inhibitor, n (%)                    | 0  | 0 | 4542 (91.6)  |
|                                                        | 1+ |   | 419 (8.4)    |
| Serotonin And Norepinephrine Reuptake Inhibitor, n (%) | 0  | 0 | 4874 (98.2)  |
|                                                        | 1+ |   | 87 (1.8)     |
| Serotonin-1B And Serotonin-1D Receptor Agonist, n (%)  | 0  | 0 | 4957 (99.9)  |
|                                                        | 1+ |   | 4 (0.1)      |
| Serotonin-3 Receptor Antagonist, n (%)                 | 0  | 0 | 1004 (20.2)  |
|                                                        | 1+ |   | 3957 (79.8)  |



|                                                                 |    |   |              |
|-----------------------------------------------------------------|----|---|--------------|
| Standardized Chemical Allergen, n (%)                           | 0  | 0 | 4945 (99.7)  |
|                                                                 | 1+ |   | 16 (0.3)     |
| Stimulant Laxative, n (%)                                       | 0  | 0 | 4721 (95.2)  |
|                                                                 | 1+ |   | 240 (4.8)    |
| Substance P/Neurokinin-1 Receptor Antagonist, n (%)             | 0  | 0 | 4560 (91.9)  |
|                                                                 | 1+ |   | 401 (8.1)    |
| Sulfonylurea, n (%)                                             | 0  | 0 | 4927 (99.3)  |
|                                                                 | 1+ |   | 34 (0.7)     |
| Tetracycline-Class Drug, n (%)                                  | 0  | 0 | 4893 (98.6)  |
|                                                                 | 1+ |   | 68 (1.4)     |
| Thalidomide Analog, n (%)                                       | 0  | 0 | 4956 (99.9)  |
|                                                                 | 1+ |   | 5 (0.1)      |
| Thiazide Diuretic, n (%)                                        | 0  | 0 | 4721 (95.2)  |
|                                                                 | 1+ |   | 240 (4.8)    |
| Thiazide-Like Diuretic, n (%)                                   | 0  | 0 | 4932 (99.4)  |
|                                                                 | 1+ |   | 29 (0.6)     |
| Topoisomerase Inhibitor, n (%)                                  | 0  | 0 | 4680 (94.3)  |
|                                                                 | 1+ |   | 281 (5.7)    |
| Tricyclic Antidepressant, n (%)                                 | 0  | 0 | 4900 (98.8)  |
|                                                                 | 1+ |   | 61 (1.2)     |
| Tuberculosis Skin Test, n (%)                                   | 0  | 0 | 4954 (99.9)  |
|                                                                 | 1+ |   | 7 (0.1)      |
| Typical Antipsychotic, n (%)                                    | 0  | 0 | 4943 (99.6)  |
|                                                                 | 1+ |   | 18 (0.4)     |
| Uncompetitive N-Methyl-D-Aspartate Receptor Antagonist, n (%)   | 0  | 0 | 4946 (99.7)  |
|                                                                 | 1+ |   | 15 (0.3)     |
| Unfractionated Heparin, n (%)                                   | 0  | 0 | 4728 (95.3)  |
|                                                                 | 1+ |   | 233 (4.7)    |
| Vascular Endothelial Growth Factor Inhibitor, n (%)             | 0  | 0 | 4354 (87.8)  |
|                                                                 | 1+ |   | 607 (12.2)   |
| Vascular Endothelial Growth Factor Receptor 2 Antagonist, n (%) | 0  | 0 | 4868 (98.1)  |
|                                                                 | 1+ |   | 93 (1.9)     |
| Vasoconstrictor, n (%)                                          | 0  | 0 | 4946 (99.7)  |
|                                                                 | 1+ |   | 15 (0.3)     |
| Vasopressin Analog, n (%)                                       | 0  | 0 | 4959 (100.0) |

|                                              |                 |                |              |
|----------------------------------------------|-----------------|----------------|--------------|
|                                              | 1+              |                | 2 (0.0)      |
| Vinca Alkaloid, n (%)                        | 0               | 0              | 4862 (98.0)  |
|                                              | 1+              |                | 99 (2.0)     |
| Vitamin B12, n (%)                           | 0               | 0              | 4667 (94.1)  |
|                                              | 1+              |                | 294 (5.9)    |
| Vitamin C, n (%)                             | 0               | 0              | 4951 (99.8)  |
|                                              | 1+              |                | 10 (0.2)     |
| Vitamin D, n (%)                             | 0               | 0              | 4917 (99.1)  |
|                                              | 1+              |                | 44 (0.9)     |
| Vitamin D3 Analog, n (%)                     | 0               | 0              | 4958 (99.9)  |
|                                              | 1+              |                | 3 (0.1)      |
| Vitamin K Antagonist, n (%)                  | 0               | 0              | 4921 (99.2)  |
|                                              | 1+              |                | 40 (0.8)     |
| Xanthine Oxidase Inhibitor, n (%)            | 0               | 0              | 4927 (99.3)  |
|                                              | 1+              |                | 34 (0.7)     |
| Alpha-1 Adrenergic Agonist, n (%)            | 0               | 0              | 4770 (96.1)  |
|                                              | 1+              |                | 191 (3.9)    |
| Alpha-Adrenergic Agonist, n (%)              | 0               | 0              | 4798 (96.7)  |
|                                              | 1+              |                | 163 (3.3)    |
| Alpha-Adrenergic Blocker, n (%)              | 0               | 0              | 4798 (96.7)  |
|                                              | 1+              |                | 163 (3.3)    |
| Beta-Adrenergic Agonist, n (%)               | 0               | 0              | 4956 (99.9)  |
|                                              | 1+              |                | 5 (0.1)      |
| Beta-Adrenergic Blocker, n (%)               | 0               | 0              | 4443 (89.6)  |
|                                              | 1+              |                | 518 (10.4)   |
| Beta2-Adrenergic Agonist, n (%)              | 0               | 0              | 4564 (92.0)  |
|                                              | 1+              |                | 397 (8.0)    |
| Gamma-Aminobutyric Acid-Ergic Agonist, n (%) | 0               | 0              | 4895 (98.7)  |
|                                              | 1+              |                | 66 (1.3)     |
| L-Thyroxine, n (%)                           | 0               | 0              | 4916 (99.1)  |
|                                              | 1+              |                | 45 (0.9)     |
|                                              |                 |                |              |
| <b>Race, n (%)</b>                           | <b>Category</b> | <b>Missing</b> | <b>n (%)</b> |
| Black or African American                    | 0               | 0              | 4274 (86.0)  |
|                                              | 1               |                | 693 (14.0)   |
| Other Race                                   | 0               | 0              | 4296 (86.5)  |

|                              |                 |                |              |
|------------------------------|-----------------|----------------|--------------|
|                              | 1               |                | 671 (13.5)   |
| White                        | 0               | 0              | 1484 (29.9)  |
|                              | 1               |                | 3483 (70.1)  |
| Unknown                      | 0               | 0              | 4847 (97.6)  |
|                              | 1               |                | 120 (2.4)    |
|                              |                 |                |              |
| <b>Ethnicity, n (%)</b>      | <b>Category</b> | <b>Missing</b> | <b>n (%)</b> |
| Hispanic or Latino           | 0               | 0              | 4847 (97.6)  |
|                              | 1               |                | 120 (2.4)    |
| Not Hispanic or Latino       | 0               | 0              | 1087 (21.9)  |
|                              | 1               |                | 3880 (78.1)  |
| Unknown                      | 0               | 0              | 4000 (80.5)  |
|                              | 1               |                | 967 (19.5)   |
|                              |                 |                |              |
| <b>Cancer Type, n (%)</b>    | <b>Category</b> | <b>Missing</b> | <b>n (%)</b> |
| Lung                         | 0               | 0              | 860 (17.3)   |
|                              | 1               |                | 4107 (82.7)  |
| Melanoma                     | 0               | 0              | 4433 (89.2)  |
|                              | 1               |                | 534 (10.8)   |
| Renal Cell Carcinoma         | 0               | 0              | 4641 (93.4)  |
|                              | 1               |                | 326 (6.6)    |
|                              |                 |                |              |
| <b>Cancer Stage, n (%)</b>   | <b>Category</b> | <b>Missing</b> | <b>n (%)</b> |
| 0                            | 0               | 236            | 4729 (100.0) |
|                              | 1               |                | 2 (0.0)      |
| 1                            | 0               | 236            | 4552 (96.2)  |
|                              | 1               |                | 179 (3.8)    |
| 2                            | 0               | 236            | 4537 (95.9)  |
|                              | 1               |                | 194 (4.1)    |
| 3                            | 0               | 236            | 4008 (84.7)  |
|                              | 1               |                | 723 (15.3)   |
| 4                            | 0               | 236            | 1098 (23.2)  |
|                              | 1               |                | 3633 (76.8)  |
|                              |                 |                |              |
| <b>Smoking Status, n (%)</b> | <b>Category</b> | <b>Missing</b> | <b>n (%)</b> |

|                                  |          |         |              |
|----------------------------------|----------|---------|--------------|
| Ex-Smoker                        | 0        | 0       | 2948 (59.4)  |
|                                  | 1        |         | 2019 (40.6)  |
| Never Smoker                     | 0        | 0       | 4301 (86.6)  |
|                                  | 1        |         | 666 (13.4)   |
| Smoker                           | 0        | 0       | 3306 (66.6)  |
|                                  | 1        |         | 1661 (33.4)  |
| Unknown                          | 0        | 0       | 4346 (87.5)  |
|                                  | 1        |         | 621 (12.5)   |
| <b>PD-1/PD-L1 Therapy, n (%)</b> |          |         |              |
| Atezolizumab                     | Category | Missing | n (%)        |
|                                  | 0        | 0       | 4662 (93.9)  |
| Avelumab                         | 0        | 0       | 4960 (99.9)  |
|                                  | 1        |         | 7 (0.1)      |
| Durvalumab                       | 0        | 0       | 4863 (97.9)  |
|                                  | 1        |         | 104 (2.1)    |
| Nivolumab                        | 0        | 0       | 1729 (34.8)  |
|                                  | 1        |         | 3238 (65.2)  |
| Pembrolizumab                    | 0        | 0       | 3661 (73.7)  |
|                                  | 1        |         | 1306 (26.3)  |
| <b>PD Test, n (%)</b>            |          |         |              |
| Negative                         | Category | Missing | n (%)        |
|                                  | 0        | 0       | 4704 (94.7)  |
| Not Interpretable                | 0        | 0       | 4733 (95.3)  |
|                                  | 1        |         | 234 (4.7)    |
| Positive                         | 0        | 0       | 4420 (89.0)  |
|                                  | 1        |         | 547 (11.0)   |
| <b>Disease, n (%)</b>            |          |         |              |
| Addison's                        | Category | Missing | n (%)        |
|                                  | 0        | 0       | 4956 (99.8)  |
| Alcoholism                       | 0        | 0       | 4901 (98.7)  |
|                                  | 1        |         | 66 (1.3)     |
| Alopecia Areata                  | 0        | 0       | 4967 (100.0) |

|                        |   |   |              |
|------------------------|---|---|--------------|
| Anemia                 | 0 | 0 | 3796 (76.4)  |
|                        | 1 |   | 1171 (23.6)  |
| Ankylosing Spondylitis | 0 | 0 | 4965 (100.0) |
|                        | 1 |   | 2 (0.0)      |
| Asthma                 | 0 | 0 | 3552 (71.5)  |
|                        | 1 |   | 1415 (28.5)  |
| Atrial Fibrillation    | 0 | 0 | 4724 (95.1)  |
|                        | 1 |   | 243 (4.9)    |
| Celiac Disease         | 0 | 0 | 4965 (100.0) |
|                        | 1 |   | 2 (0.0)      |
| Chron's Disease        | 0 | 0 | 4961 (99.9)  |
|                        | 1 |   | 6 (0.1)      |
| Depression             | 0 | 0 | 4628 (93.2)  |
|                        | 1 |   | 339 (6.8)    |
| Diabetes               | 0 | 0 | 4598 (92.6)  |
|                        | 1 |   | 369 (7.4)    |
| Glaucoma               | 0 | 0 | 4946 (99.6)  |
|                        | 1 |   | 21 (0.4)     |
| Heart Disease          | 0 | 0 | 4528 (91.2)  |
|                        | 1 |   | 439 (8.8)    |
| Hyperlipidemia         | 0 | 0 | 4357 (87.7)  |
|                        | 1 |   | 610 (12.3)   |
| Hypertension           | 0 | 0 | 3890 (78.3)  |
|                        | 1 |   | 1077 (21.7)  |
| Lupus                  | 0 | 0 | 4962 (99.9)  |
|                        | 1 |   | 5 (0.1)      |
| Multiple Sclerosis     | 0 | 0 | 4958 (99.8)  |
|                        | 1 |   | 9 (0.2)      |
| Myasthenia Gravis      | 0 | 0 | 4967 (100.0) |
|                        | 1 |   | 0 (0.0)      |
| Myocardial Infarction  | 0 | 0 | 4932 (99.3)  |
|                        | 1 |   | 35 (0.7)     |
| Myositis               | 0 | 0 | 4824 (97.1)  |
|                        | 1 |   | 143 (2.9)    |

|                          |   |   |              |
|--------------------------|---|---|--------------|
| Osteoporosis             | 0 | 0 | 4876 (98.2)  |
|                          | 1 |   | 91 (1.8)     |
| Pros Hplasia             | 0 | 0 | 4829 (97.2)  |
|                          | 1 |   | 138 (2.8)    |
| Psoriasis                | 0 | 0 | 4946 (99.6)  |
|                          | 1 |   | 21 (0.4)     |
| Psoriatic Arthritis      | 0 | 0 | 4966 (100.0) |
|                          | 1 |   | 1 (0.0)      |
| Rheumatoid Arthritis     | 0 | 0 | 4914 (98.9)  |
|                          | 1 |   | 53 (1.1)     |
| Sarcoidosis              | 0 | 0 | 4961 (99.9)  |
|                          | 1 |   | 6 (0.1)      |
| Scleroderma              | 0 | 0 | 4966 (100.0) |
|                          | 1 |   | 1 (0.0)      |
| Sjogren's                | 0 | 0 | 4941 (99.5)  |
|                          | 1 |   | 26 (0.5)     |
| Thyroid Disease          | 0 | 0 | 4573 (92.1)  |
|                          | 1 |   | 394 (7.9)    |
| Type 1 Diabetes Mellitus | 0 | 0 | 4954 (99.7)  |
|                          | 1 |   | 13 (0.3)     |
| Ulcerative Colitis       | 0 | 0 | 4956 (99.8)  |
|                          | 1 |   | 11 (0.2)     |

Supplementary Table 4. Comparison of Model Performance Across Sensitivity Analyses

| Model                              | AUC-ROC at 100 days | Concordance Index |
|------------------------------------|---------------------|-------------------|
| All Features                       | 0.65                | 0.66              |
| Top 20 Features Only               | 0.65                | 0.65              |
| Missing Features Imputed with MICE | 0.66                | 0.66              |
| Exclude Features > 70% Missing     | 0.66                | 0.68              |
| Exclude Features > 80% Missing     | 0.65                | 0.64              |
| Exclude Features > 90% Missing     | 0.64                | 0.65              |



**Supplementary Table 5.** Summary of SHAP Interpretations

| <b>Variable</b>                       | <b>Direction</b> | <b>P-values</b> |
|---------------------------------------|------------------|-----------------|
| Age                                   | ↑                | 0               |
| Race                                  |                  |                 |
| White                                 | -                | 0.548           |
| Black or African American             | -                | 0.978           |
| Other Race                            | -                | 0.268           |
| Missing                               | -                | 1               |
| Ethnicity                             |                  |                 |
| Hispanic or Latino                    | -                | 0.99            |
| Not Hispanic or Latino                | -                | 0.95            |
| Unknown                               | -                | 0.944           |
| Cancer Type                           |                  |                 |
| Lung                                  | -                | 0.486           |
| Melanoma                              | -                | 0.998           |
| RCC                                   | -                | 0.696           |
| Stage                                 |                  |                 |
| Stage 1                               | -                | 0.92            |
| Stage 2                               | -                | 0.936           |
| Stage 3                               | -                | 0.93            |
| Stage 4                               | -                | 0.31            |
| Smoking Status                        |                  |                 |
| Smoker                                | -                | 0.776           |
| Ex-Smoker                             | -                | 0.878           |
| Never Smoker                          | -                | 0.934           |
| Performance Status                    | -                | 0.23            |
| Charlson Score                        | -                | 0.118           |
| Comorbidities                         |                  |                 |
| Cerebrovascular Disease               | -                | 0.988           |
| Chronic Pulmonary Disease             | -                | 0.71            |
| Congestive Heart Failure              | -                | 0.376           |
| Diabetes With Chronic Complication    | -                | 0.964           |
| Diabetes Without Chronic Complication | -                | 0.966           |
| Hemiplegia Or Paraplegia              | -                | 1               |
| Metastatic Solid Tumor                | -                | 0.994           |



|                                              |   |       |
|----------------------------------------------|---|-------|
| Mild Liver Disease                           | - | 0.972 |
| Moderate Or Severe Liver Disease             | - | 1     |
| Myocardial Infarction                        | - | 0.848 |
| Peptic Ulcer Disease                         | - | 0.996 |
| Peripheral Vascular Disease                  | - | 0.816 |
| Renal Disease                                | - | 0.75  |
| Rheumatic Disease                            | - | 0.998 |
| PD-1/PD-L1 Therapy                           |   |       |
| Atezolizumab                                 | - | 0.906 |
| Avelumab                                     | - | 1     |
| Durvalumab                                   | - | 1     |
| Nivolumab                                    | - | 0.872 |
| Pembrolizumab                                | - | 0.972 |
| PD-L1 Test Result                            |   |       |
| Positive                                     | - | 0.272 |
| Negative                                     | - | 0.968 |
| Not interpretable                            | - | 0.99  |
| Other Significant Variables                  |   |       |
| Neutrophils Percent                          | ↑ | 0     |
| Substance P/Neurokinin-1 Receptor Antagonist | ↑ | 0     |
| Absolute Lymphocyte Count                    | ↓ | 0     |
| Platelets                                    | ↑ | 0     |
| T                                            | ~ | 0     |
| Cl                                           | ↓ | 0     |
| Lymphocytes Percent                          | ↓ | 0     |
| HR                                           | ~ | 0     |
| Hb                                           | ↓ | 0     |
| Cr                                           | ↓ | 0     |
| Na                                           | ↓ | 0.002 |
| BUN                                          | ↑ | 0.002 |
| Delta Weight                                 | ↑ | 0.002 |
| ALT                                          | ↓ | 0.002 |
| Serotonin-3 Receptor Antagonist              | ↓ | 0.002 |
| Phenothiazine                                | ↑ | 0.002 |
| LDH                                          | ↑ | 0.004 |
| PT                                           | ~ | 0.004 |

|                                                                                                                                                                                                                                                                                            |   |       |
|--------------------------------------------------------------------------------------------------------------------------------------------------------------------------------------------------------------------------------------------------------------------------------------------|---|-------|
| Absolute Neutrophil Count                                                                                                                                                                                                                                                                  | ~ | 0.006 |
| Corticosteroid                                                                                                                                                                                                                                                                             | ↓ | 0.008 |
| Vinca Alkaloid                                                                                                                                                                                                                                                                             | ↑ | 0.008 |
| Weight                                                                                                                                                                                                                                                                                     | ~ | 0.008 |
| Eosinophils Percent                                                                                                                                                                                                                                                                        | ↓ | 0.01  |
| AST                                                                                                                                                                                                                                                                                        | ↓ | 0.01  |
| Loop Diuretic                                                                                                                                                                                                                                                                              | ↓ | 0.01  |
| BMI                                                                                                                                                                                                                                                                                        | ~ | 0.01  |
| Alk Phos                                                                                                                                                                                                                                                                                   | ↓ | 0.022 |
| Phos                                                                                                                                                                                                                                                                                       | ↑ | 0.024 |
| WBC                                                                                                                                                                                                                                                                                        | ↑ | 0.024 |
| Angiotensin Converting Enzyme Inhibitor                                                                                                                                                                                                                                                    | ↓ | 0.026 |
| Programmed Death Receptor-1 Blocking Antibody                                                                                                                                                                                                                                              | ↓ | 0.028 |
| Microtubule Inhibitor                                                                                                                                                                                                                                                                      | ↑ | 0.028 |
| Folate Analog Metabolic Inhibitor                                                                                                                                                                                                                                                          | ↓ | 0.048 |
| Abbreviations: CoA, co-enzyme A; CTLA-4, cytotoxic T-lymphocyte-associated protein 4; ECOG, Eastern Cooperative Oncology Group; HER, human epidermal growth factor receptor; HMG, hemoglobin; PD-1, programmed death receptor-1; PD-L1, programmed death ligand-1; SD, standard deviation. |   |       |

**Supplementary Figure 1.** Summary of SHAP Interpretations – Only Use Variables from Before Index

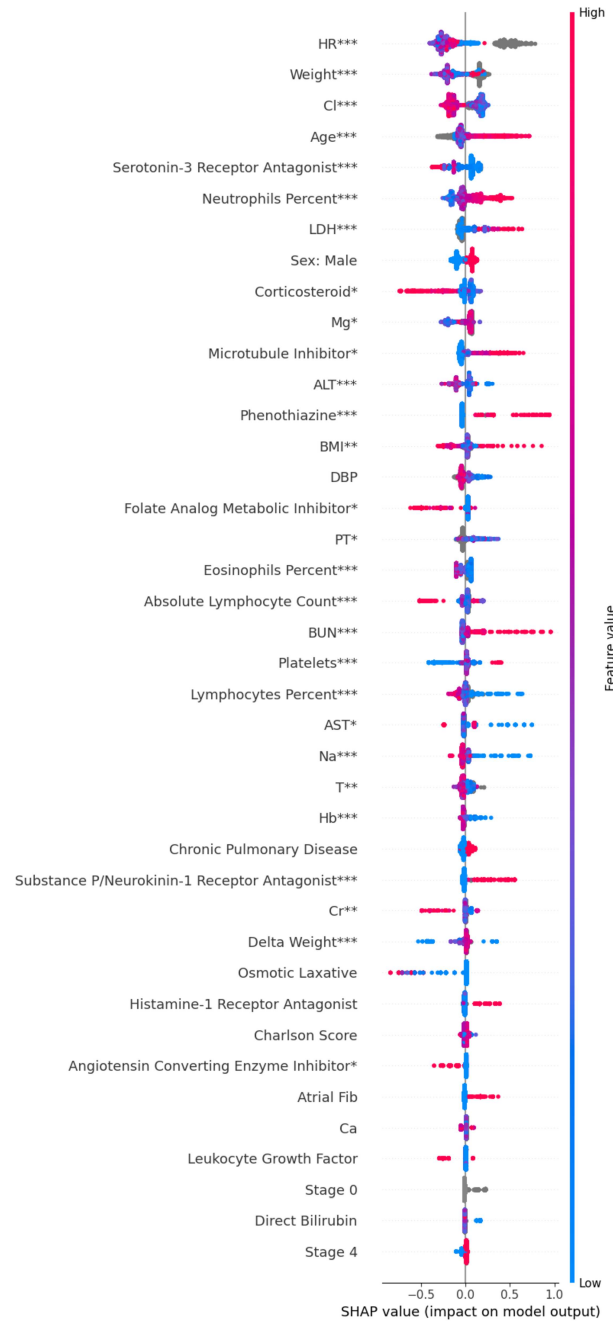

**Supplementary Figure 2.** Summary of SHAP Interpretations – Remove Features with > 70% Missingness

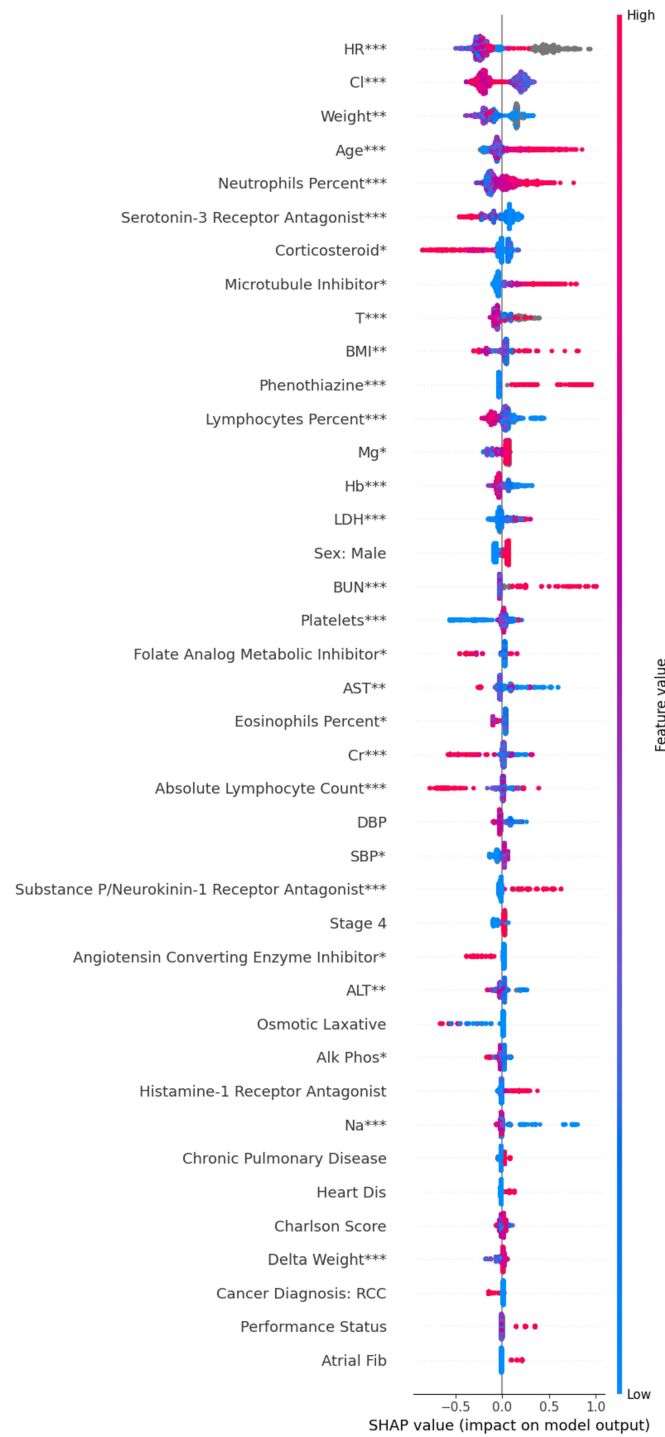

**Supplementary Figure 3.** Summary of SHAP Interpretations – Remove Features with > 80% Missingness

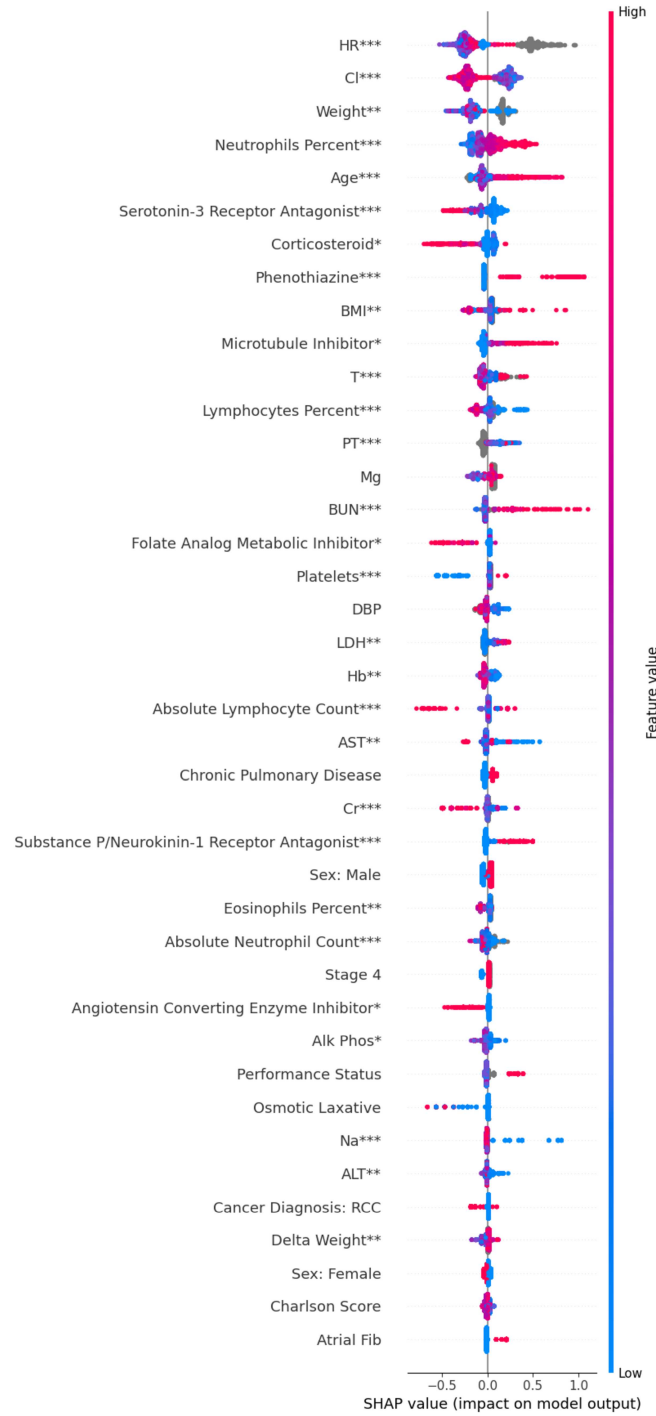

**Supplementary Figure 4.** Summary of SHAP Interpretations – Remove Features with > 90% Missingness

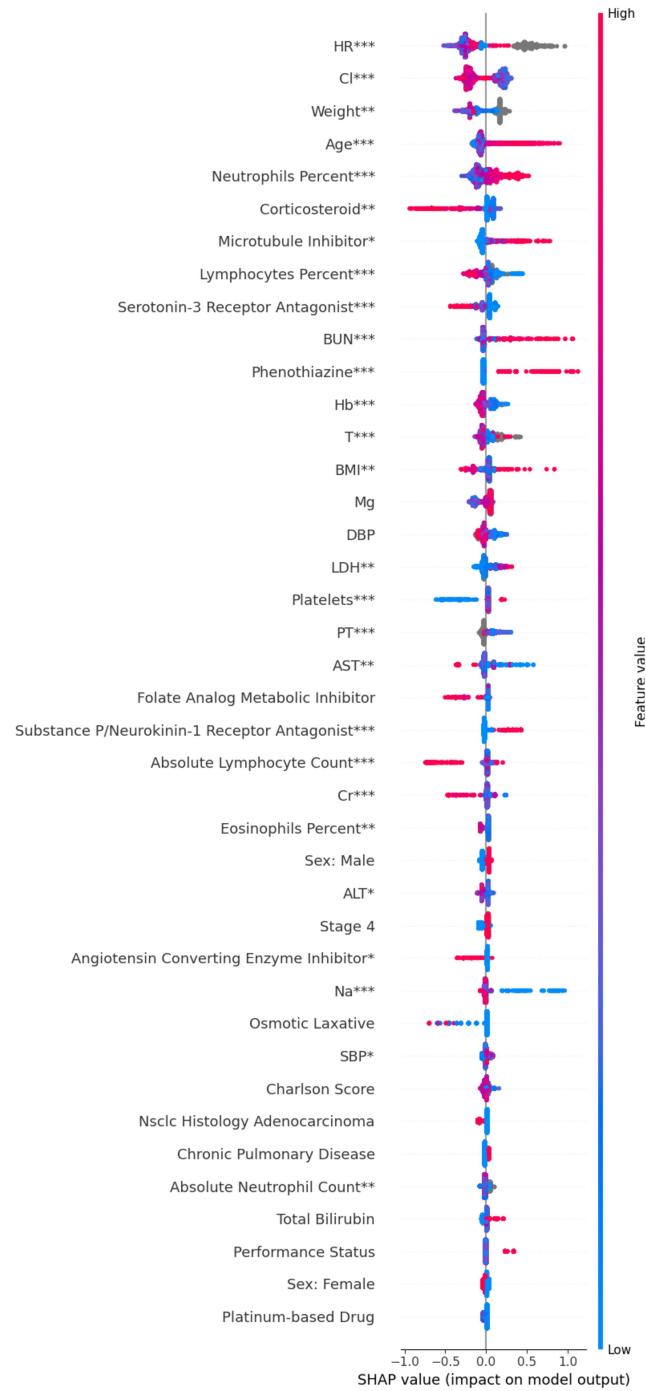

**Supplementary Figure 5.** Summary of SHAP Interpretations – Features Imputed with MICE

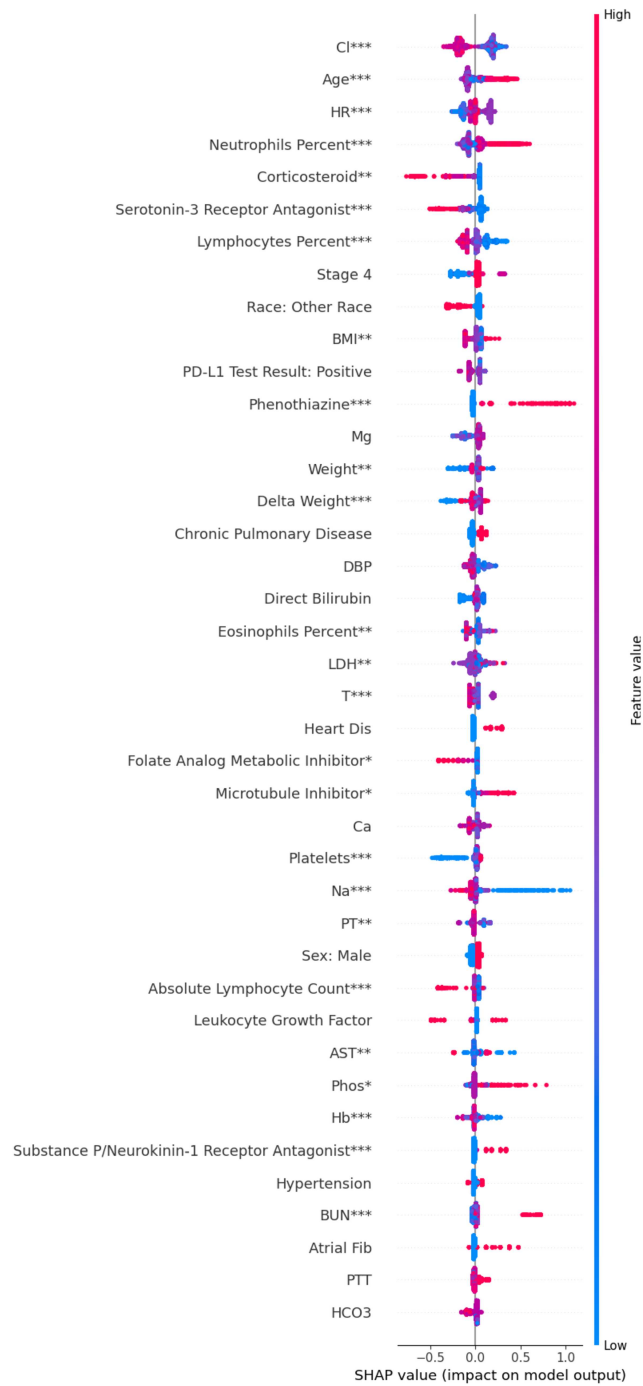

Supplement: jitc-2021-002545supp001.pdf [file jitc-2021-002545supp001.pdf]
